# Supplementary material for: A hierarchical metafabric with dynamically thermochromic property for subambient daytime radiative cooling
Source: Royal Society of Chemistry journal article supplement (doi:10.1039/d3tc03769j), 2023-12-20
Supplement: d3tc03769j6.pdf [file d3tc03769j6.pdf]

# Supporting Information

## A hierarchical metafabric with dynamically thermochromic property for subambient daytime radiative cooling

Rong Zhang,<sup>1,2</sup> Renzhi Li,<sup>1</sup> Peng Xu,<sup>1</sup> Bo Xiang<sup>1\*</sup>

<sup>1</sup> College of Science, Nanjing Forestry University, Nanjing 210037, P. R. China.

<sup>2</sup> College of Engineering and Applied Sciences, Nanjing University, Nanjing 210093,  
P. R. China

\*Corresponding author. Email: [xiangbo@njfu.edu.cn](mailto:xiangbo@njfu.edu.cn)

### This file includes:

**Table S1** Optical properties of samples in this work.

**Fig. S1** FT-IR spectra of TRM<sub>GN</sub>, PA6/SiO<sub>2</sub>, PA6.

**Fig. S2** SEM of TRM.

**Fig. S3** The reflectivity (a) and transmittance (b) of PA6 and TRM across 2.5-15 μm.

**Fig. S4** Strain-stress curve of the dual-mode fiber membrane.

**Fig. S5** Photograph of the setup for the sunlight radiation test.

Table S1 Optical properties of samples in this work.

| Optical properties                       | TRM   | TRM <sub>RD</sub> | TRM <sub>GN</sub> |
|------------------------------------------|-------|-------------------|-------------------|
| $R_{lum,20\text{ }^{\circ}\text{C}}$ (%) | 96.28 | 49.88             | 36.06             |
| $R_{lum,40\text{ }^{\circ}\text{C}}$ (%) | 96.99 | 90.01             | 88.70             |
| $\Delta R_{lum}$ (%)                     | 0.71  | 40.13             | 52.64             |
| $R_{sol,20\text{ }^{\circ}\text{C}}$ (%) | 93.07 | 63.42             | 55.95             |
| $R_{sol,40\text{ }^{\circ}\text{C}}$ (%) | 94.11 | 88.06             | 87.66             |
| $\Delta R_{sol}$ (%)                     | 1.04  | 24.64             | 31.71             |

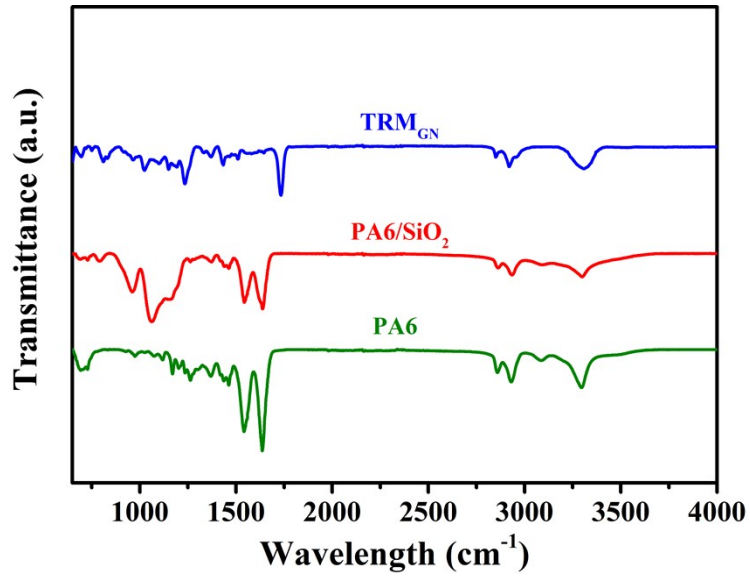

Fig. S1 FT-IR spectra of TRM<sub>GN</sub>, PA6/SiO<sub>2</sub>, PA6.

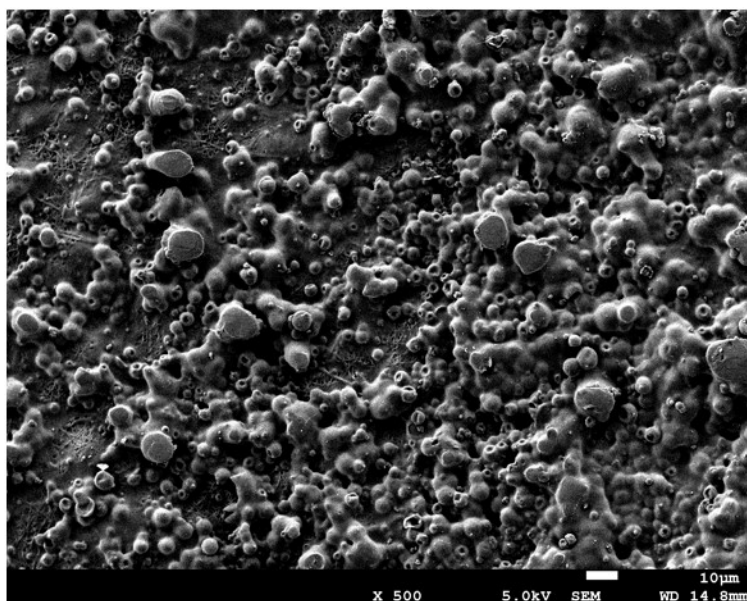

Fig. S2 SEM of TRM.

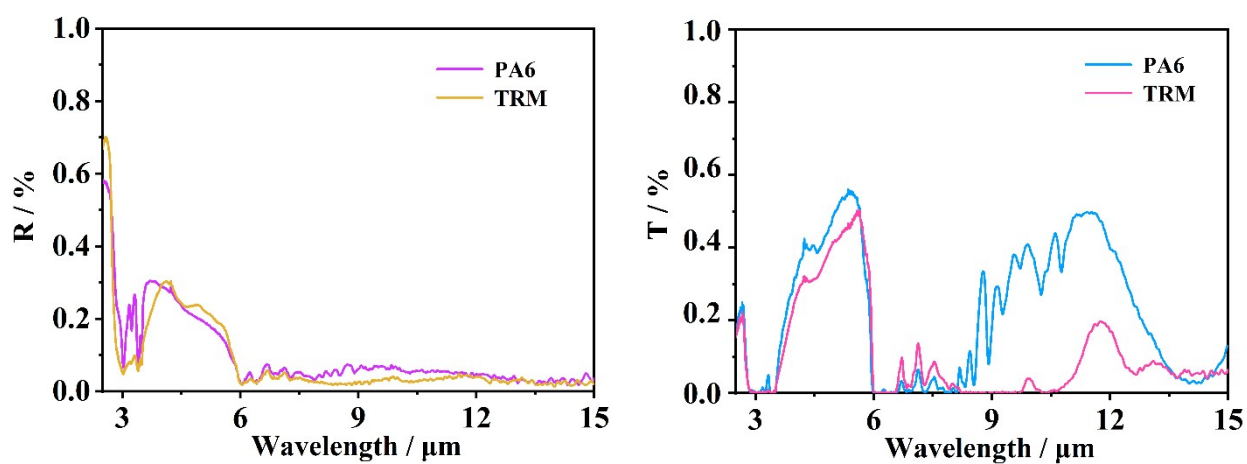

Fig. S3 The reflectivity (a) and transmittance (b) of PA6 and TRM across 2.5-15 µm.

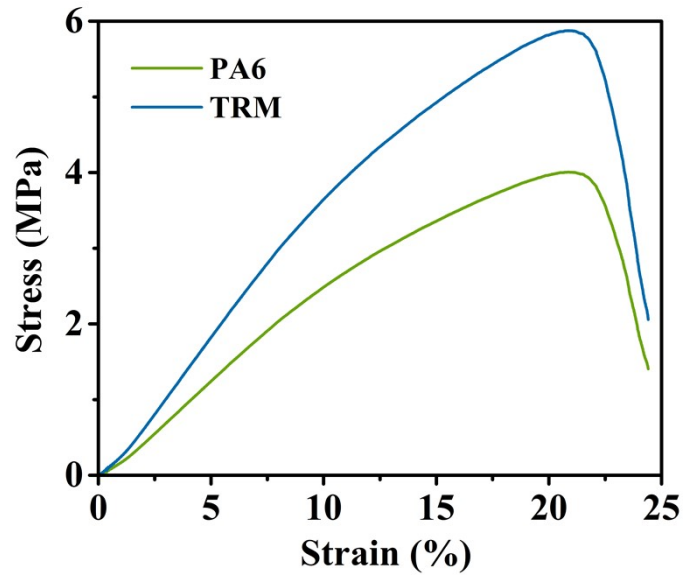

**Fig. S4** Strain-stress curve of the dual-mode fiber membrane.

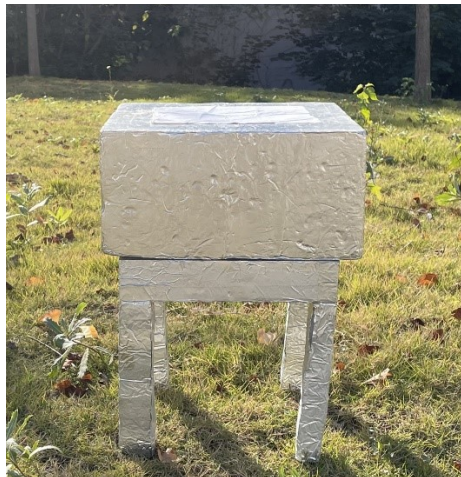

**Fig. S5** Photograph of the setup for the sunlight radiation test.
